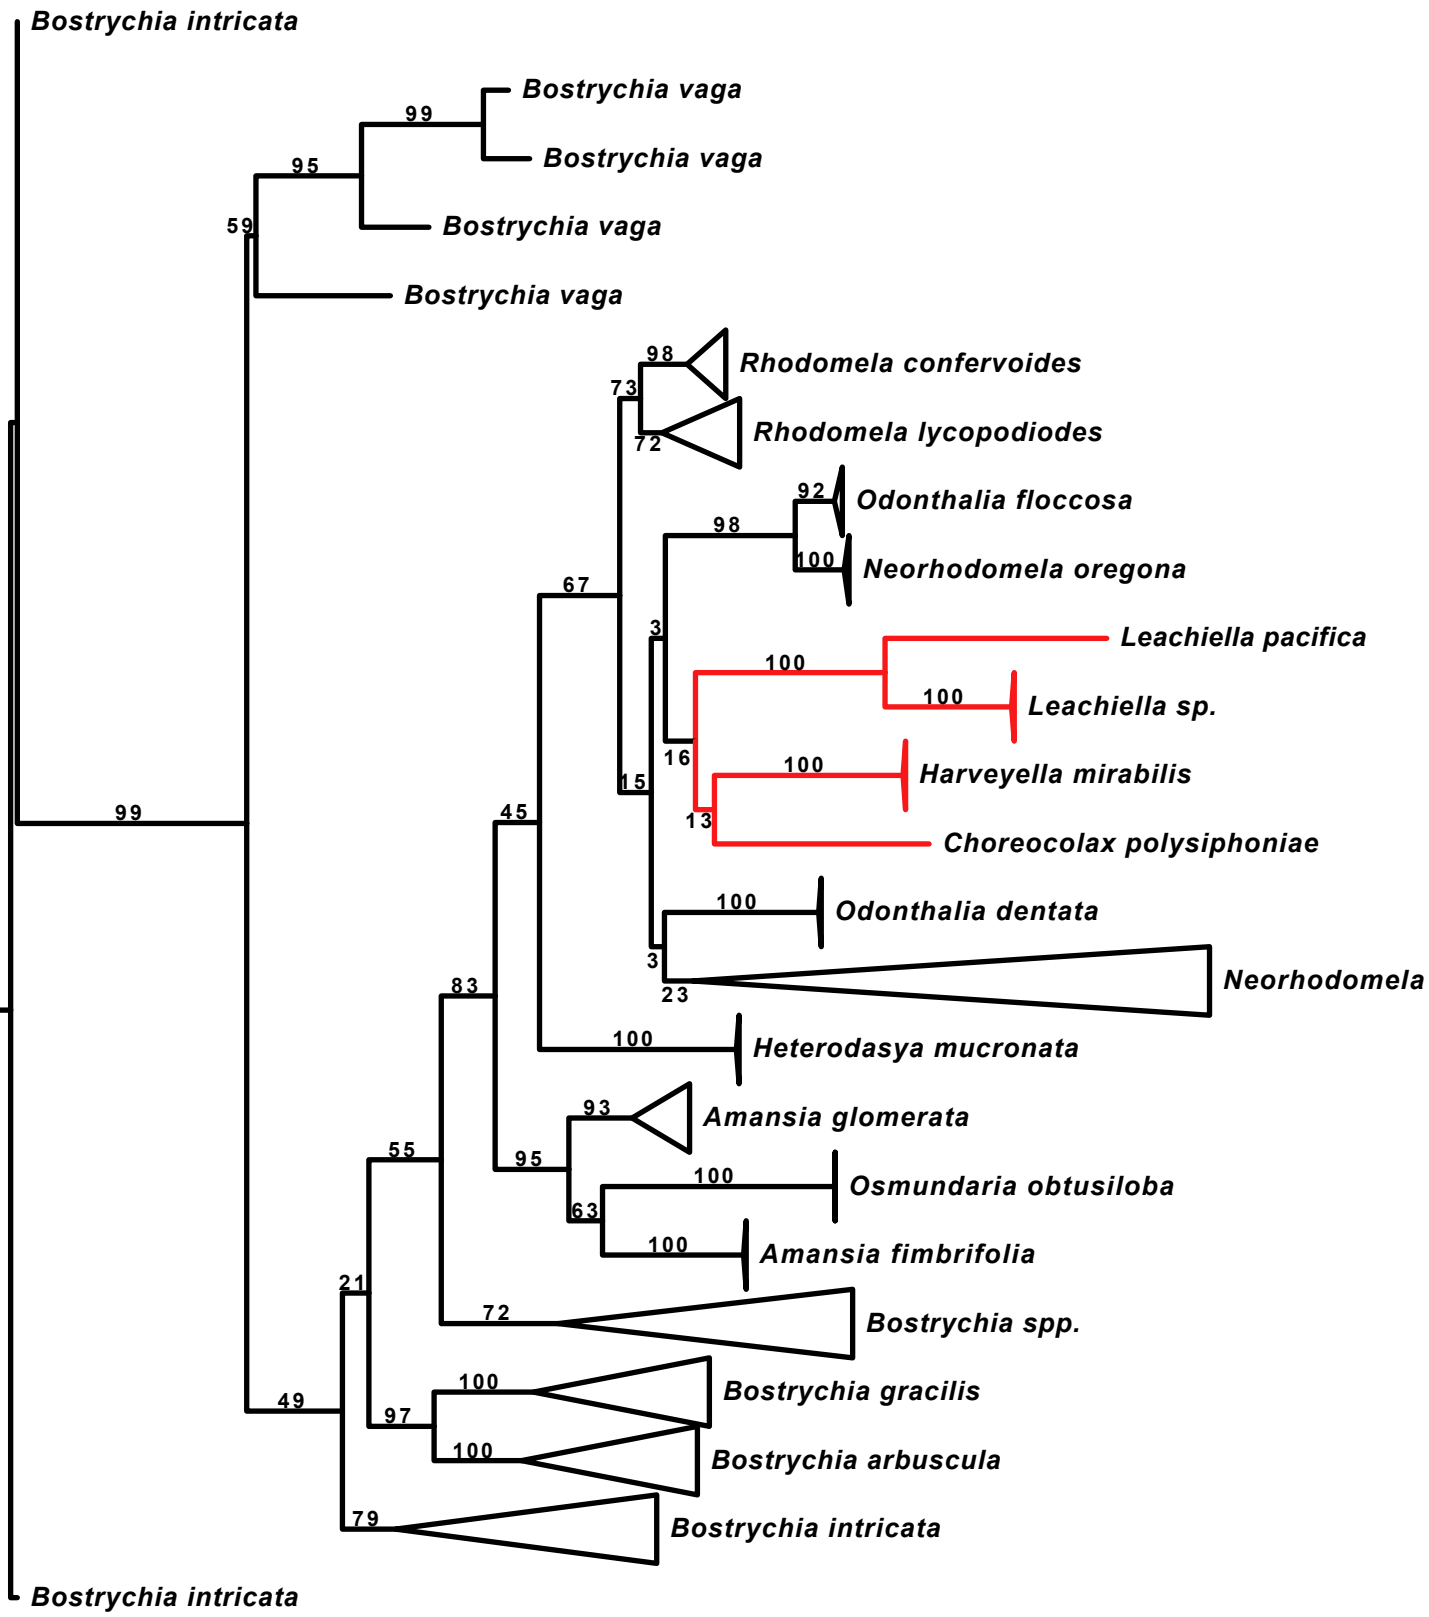

0.08
